# Supplementary material for: El enigma Nefertiti
Source: Royal Society of Chemistry journal article supplement (doi:10.1039/d3an01126g), 2003-01-01
Supplement: d3an01126g1.pdf [file d3an01126g1.pdf]

## Supporting Information

### Novel design of DNA duplex containing programmable sensing site for nanopore-based length-resolution reading and application on Pb<sup>2+</sup> and cfDNA analysis

Jiahai Wang<sup>1</sup>, Cenlin Gui<sup>1</sup>, Jianji Zhu<sup>1</sup>, Baian Zhu<sup>1</sup>, Zhuobin Zhu<sup>1</sup>, XiwenJiang<sup>2</sup>, Daqi Chen<sup>1\*</sup>

<sup>1</sup>School of Chemistry and Chemical Engineering, School of Mechanical and Electrical Engineering, Guangzhou University, Guangzhou, Guangdong, 510006, China

<sup>2</sup>School of Life Sciences and Biopharmaceutics, Guangdong Pharmaceutical University, Guangzhou, China

E-mail: [daqichen@gzhu.edu.cn](mailto:daqichen@gzhu.edu.cn); [jiahaiwang@gzhu.edu.cn](mailto:jiahaiwang@gzhu.edu.cn)

**Table 1. All oligonucleotide sequences used in this study**

#### Oligonucleotide sequences used when the target molecule was Pb<sup>2+</sup>

| Name                  | Sequences (5'-3')                                   |
|-----------------------|-----------------------------------------------------|
| DNAzyme               | AATCATCTCTGAAGTAGCGCCGCGTAGTG                       |
| 412bp-Forward primer  | CTGACCCTGATGAGTTCGTGT                               |
| 819bp-Forward primer  | CCGAAAGAATCCGCATACCAG                               |
| 15+412-Reverse primer | CTCTAGGTACTCTTASpacer18CGTTCCCGGCAGC<br>ACAAAT      |
| 20+412-Reverse primer | AGGTTCTTTGTATGCGATCASpacer18CGTTCCCG<br>GCAGCACAAAT |
| 25+412-Reverse primer | CTTCTTGATGATCCGACGGCCTAGTSpacer18CGT                |

|                           |                                                                                                            |
|---------------------------|------------------------------------------------------------------------------------------------------------|
|                           | TCCCGGCAGCACAAAT                                                                                           |
| 15+Sub+819-Reverse primer | <u>TAAGAGTACCTAGAG</u> <u>CACT/rA/GGAAGAGATGA</u><br><u>T</u> Spacer18ACCGGATGACGAAAACCAGAG                |
| 20+Sub+819-Reverse primer | <u>TGATCGCATACAAAGAACCT</u> <u>CACT/rA/GGAAGAG</u><br><u>ATGATT</u> Spacer18ACCGGATGACGAAAACCAGAG          |
| 25+Sub+819-Reverse primer | <u>ACTAGGCCGTCGGATCATCAAGAAG</u> <u>CACT/rA/GG</u><br><u>AAGAGATGATT</u> Spacer18ACCGGATGACGAAAAC<br>CAGAG |

**Oligonucleotide sequences used when the target molecule was cfDNA**

| Name                     | Sequences (5'-3')                                                                                       |
|--------------------------|---------------------------------------------------------------------------------------------------------|
| 411bp-Forward primer     | GTTTTCATGTTGCCTGCCCG                                                                                    |
| 411bp-Reverse primer     | <u>TTACAACCTCGTCAGAATCC</u> Spacer18GTTCGCC<br>AATTTTCGCCTCC                                            |
| Sub+791bp-Forward primer | <u>GGATTCTGACGAGGTTGTAAG</u> <u>TCCGTTCAACCT</u><br><u>CCCATCTCAGT</u> Spacer18CAGCGTCACAACAATC<br>AGCC |
| 791bp-Reverse primer     | TCAGTGTCGCATTCTTCGGT                                                                                    |

|         |                                                         |
|---------|---------------------------------------------------------|
| crRNA   | UAAUUUCUACUAAGUGUAGAUTGGCAAACCTC<br>AGGTAGAATT          |
| BRCA-1  | GGGCAGGCACTTTATGGCAAACCTCAGGTAGAA<br>TTCTTCCTCTTCCGTCT  |
|         | AGACGGAAGAGGAAGAATTCTACCTGAGTTTG<br>CCATAAAGTGCCTGCCC   |
| BRCA-2  | TGGCTTAGAGAAGGAATATTTGATGGTCAACC<br>AGAAAGAATAAATACTGC  |
|         | GCAGTATTTATTCTTTCTGGTTGACCATCAAAT<br>ATTCCTTCTCTAAGCCA  |
| BRAF    | GTTATCAGACTTGAATGTTTCGTAAAGTTTATAA<br>GCTCTGCCCTGTCTGTA |
|         | TACAGACAGGGCAGAGCTTATAAACTTTACGA<br>ACATTCAAGTCTGATAAC  |
| MCRC    | TTGGCTTGTGTACCGTCAATTTAGGTCAGGAAT<br>GGCCGTGTATACATCAA  |
|         | TTGATGTATACACGGCCATTCCTGACCTAAATT<br>GACGGTACACAAGCCAA  |
| miR-21  | ATCAATCCTGCTTGAATATCCACTTTGTACCCA<br>TCATCGTCTGTGACATC  |
| miR-141 | ATCTTACTAGACAGTGCTGGATTTCTTGGATCT                       |

ATTCTAACACTGTCTGG

Sequences of special colours are random complementary sequences. The underlined sequences are substrates of GR-5 DNase and CRISPR/cas12a system.

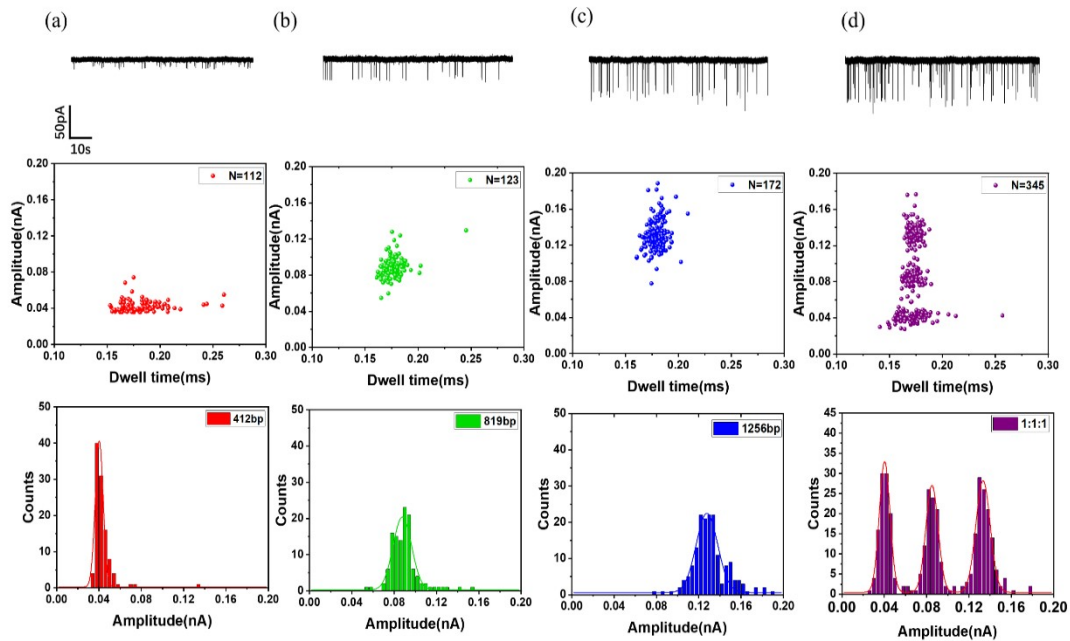

**Fig. S1** Experiment results of measuring signals of dsDNA with different lengths using glass nanopores. The diagrams are the current time trace, the scatter plot of event amplitude versus dwell time, and the frequency distribution histogram of the event amplitude. (a) 412bp (b) 819bp (c) 1256bp (d) Mixed. (Concentration ratio of 412 bp: 819 bp: 1256 bp=1:1:1) All data were obtained by recording at -1000 mV for 5 mins.

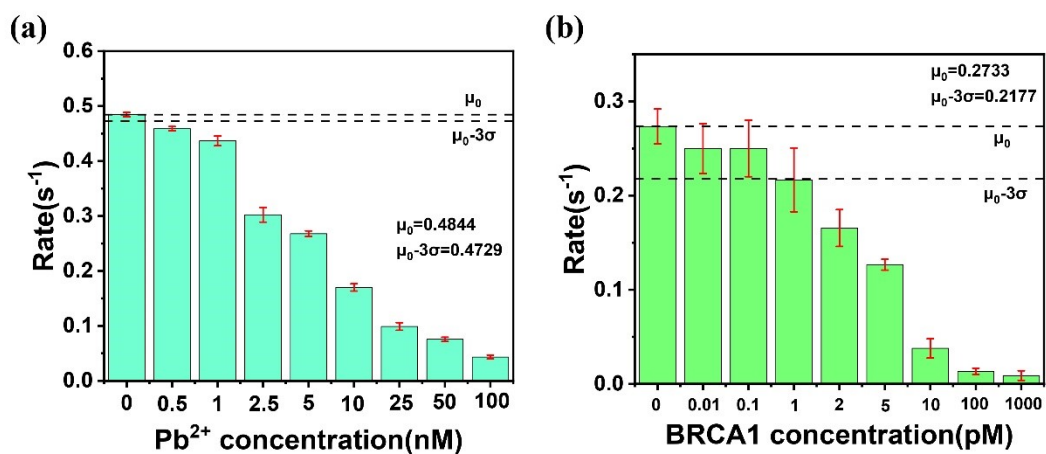

**Fig. S2** Event rates of the sensor when detecting different concentration of target molecules. When the  $S/N = 3$  the detection limit was calculated as: a) 0.4 nM for detection of  $Pb^{2+}$ ; b) 1 pM for detection of BRCA-1.
